# Supplementary material for: Regulating the microstructure of two-dimensional perovskite single-crystals via high-throughput experimentations
Source: Research Square preprint supplement (doi:10.21203/rs.3.rs-6431736/v1), 2025-05-12
Supplement: Supplementary file 1 [file 9082b3693af6feb9f005409e.docx]

Supplementary Information for

Regulating the microstructure of two-dimensional perovskite single-crystals via high-throughput experimentations

Jingyan Qi1, Wei Meng1, Kang An1, Xujie Hui1, Liqun Liu1, Yuguang Ma1, Ning Li1*

*Corresponding author. E-mail: [ningli2022@scut.edu.cn](mailto:ningli2022@scut.edu.cn) (N.L.)

This file contains

Supplementary Note 1 – 2

Supplementary Tables 1 – 8

Supplementary Figures 1 – 10

References

**Supplementary Note 1. High-throughput preparation of two-dimensional perovskite single crystals and thin films**

High-Throughput Processing Environments

Most of the experimental components of this work were accomplished using a self-constructed rapid and multifunctional high-throughput experimental platform for optoelectronic materials, as illustrated in Supplementary Fig. 2. This platform integrates an eight-channel liquid-handling robot (FCA, Flexible Channel Arm, Tecan Trading AG, Switzerland), which enables precise preparation of perovskite precursor solutions with varying compositions in a custom-designed 24-well plate. The system accommodates a wide range of liquid types and allows parameter adjustments through the FluentControl software to meet specific experimental requirements.

After solution preparation, the precursor solutions are deposited onto glass substrates via drop casting or spin coating to form perovskite thin films. To optimize the experimental workflow, we have designed and developed customized substrate trays, a spin coater (CY-SPC8-DZ, CY Scientific Instrument Co. Ltd, China), and an annealing hotplate (RCT basic S025, Aika (Guangzhou) Instrument Equipment Co., Ltd, China) to ensure efficient operation. Additionally, a robotic gripper arm (RGA, Tecan Trading AG, Switzerland) autonomously transfers glass substrates and trays between different functional modules, enabling a streamlined and fully automated material preparation and processing workflow.

Solution-phase synthesis of pure 2D halide perovskite single crystal

In this work, 14 pure two-dimensional perovskite micro-sized single crystals have been synthesized using quaternary solvents.

1. Preparation of Stock Solutions

10 μmol PbI2 was dissolved with 20 μmol LI (L= t-BA, i-PA, PA, BA, PentA, HA, OA, NonylA, DDA, PhA, PMA, PEA, PPA, PBA) in 2 mL of DMF/CB (1:1, v/v) co-solvent to obtain 5 mM of 2D perovskite stock solution. CB/ACN/DCB (9.5:0.1:0.01, v/v) co-solvent was prepared as a dilution solvent.

2. High-Throughput Experimental Conditions

The entire experimental process was conducted in a nitrogen-filled glovebox. Initially, alkylamine and aromatic amine ligands were automatically diluted to the designated ratios using the FCA program. Subsequently, the RGA system transported the glass substrates to a heated stage for preheating. A precise volume of the perovskite dilute solution was then dispensed onto the substrate to facilitate single-crystal growth, which typically lasted between 1 and 3 minutes.

Step 1: Solution Dilution

Dilution parameters were configured in FluentControl as follows: Alkylamine ligands (t-BA, i-PA, PA, BA, PentA, HA, OA, NonylA, and DDA) were diluted at factors of 60, 120, 240, 480, 560, 640, and 960, while aromatic amine ligands (PhA, PMA, PEA, PPA, and PBA) were diluted at factors of 30, 60, 120, 180, 240, and 480. The dilution parameters are shown in SupplementaryTable 1. Once the parameters were set, the high-throughput platform autonomously executed the dilution process.

Step 2: Drop Casting

The RGA system first transported the glass substrates to the heated stage and preheated them to 70 ℃. Subsequently, the FCA system sequentially aspirated 50–100 μL of perovskite solutions with different dilution factors and dispensed them onto the substrates. The single-crystal growth process was set to last 1–3 minutes. Upon completion, the RGA system automatically transferred the drop-cast substrates to the designated tray, finalizing the sample preparation process. The entire procedure was executed according to predefined protocols, with FCA capable of simultaneously processing four substrates in a single run, maintaining an operation time of under one minute.

Preparation of two-dimensional perovskite thin films

1. Preparation of Stock Solutions

A 1M 2D perovskite precursor solution was prepared by dissolving PbI2 with LI in DMF at 1:2 (mol: mol). The dissolved solution was filtered with a 0.22 μm PTFE hydrophobic filter tip to remove impurities.

2. High-Throughput Experimental Conditions

The entire experiment was conducted in a nitrogen-filled glovebox. First, the prepared precursor solution was spin-coated onto glass substrates. The RGA system then transported the coated substrates to a heated stage, where a specified volume of perovskite dilute solution was dispensed onto the surface, followed by the addition of an antisolvent. Finally, the substrates underwent an annealing process to complete the fabrication.

Step 1: Spin Coating

The RGA system transferred the glass substrates from the tray to the spin coater. The FCA system then precisely dispensed 50 μL of precursor solution onto each substrate, initiating the spin-coating process. The spin coater was set to operate at 4000 rpm for 30 seconds. At the 20-second mark, the FCA system dispensed 150 μL of chlorobenzene (CB) onto the substrate, ensuring a controlled dispensing time within 1 second.

Step 2: Thermal Annealing

After spin coating, the RGA system transferred the glass substrates to a heated stage for annealing at 70 ℃ for 10 minutes. Upon completion, the RGA system relocated the annealed substrates to the designated tray, finalizing the process.

**Supplementary Note 2. Molecular dynamics and DFT simulation for two-dimensional perovskite solution and crystal**

Solution molecular dynamics simulation

Use Material Studio simulation software to establish AC Constructs of 14 LI solutions in proportion to solution concentration. The AC Constructs contained 10 L+ ions (L+ = t-BA+, i-PA+, PA+, BA+, PentA+, HA+, OA+, NonylA+, DDA+, PhA+, PMA+, PEA+, PPA+, PBA+), 10 I- ions, 6 DMF molecules, 1064 CB molecules, 217 ACN molecules, and 1 DCB molecule. The *Forcite* module was used for geometric optimization of AC Construct, the force field was selected COMPASSIII, and the *Quality* was set to *Ultra-fine* to obtain the optimized AC Construct. Dynamics calculations were done on the optimized AC Construct using the Forcite module, with COMPASSIII selected for the force field, NVT coefficients, *Initial velocities* as *Random*, *Temperature* as 343K, *Time step* as 1.0 fs, *Total simulation time* is 50.0 ps, *Number of step* is 50000, and the kinetic results of the solution at 70 ℃ are obtained. The results contain the energy, entropy, temperature, pressure, volume, and density of the system. A total of 500 frames were generated from the initial state to the 70 ℃ steady state. A script was used to calculate the L+-CB binding energy in the solution by setting L+ and CB to Layer 1 and Layer 2, respectively, and obtaining the binding energies of L+ and CB for 500 frames of the kinetic results, with the final binding energy values averaged over 500 frames.

Extracting L+ and CB models and optimizing the molecular dynamics geometry of L+-CB using the *Forcite* module. The force field is selected as COMPASSIII, and the *Quality* is set to *Ultra-fine* to obtain the geometry of L+-CB after structural optimization. Further geometry optimization of L+-CB was done using *CASTEP* module with *Ultra-fine* for *Quality*, GGA-PBE selected for generalization, *Non-polarized*, *Truncation energy* of 570.00 eV, *Pseudopotentials* of OTFG ultrasoft, *Relativistic treatment* is Koeling-Hamon, and the quantum-mechanical geometry optimization of L+-CB is obtained. The L+-CB electrostatic potentials were further calculated using the *DMol3* module, with the generalized function chosen as GGA-PBE and the *Quality* as *Fine*, to obtain the electrostatic potentials of the 14 L+-CB structures schematically1.

Crystal molecular dynamics simulation

Using Material Studio simulation software, the ligands were replaced with known (BA)2PbI4 cell parameters and symmetry to build the remaining 13 two-dimensional perovskite singlet cells, yielding the space group as PBCA and the ligands as t-BA+, i-PA+, PA+, BA+, PentA+, HA+, OA+, NonylA+, DDA+, PhA+, PMA+, PEA+, PPA+, and PBA+ for 14 single-cell models. Geometry optimization of single cells was done using the *Forcite* module, using *Universal force field* with *Ultra-fine Quality*, and molecular dynamics geometry optimization results were obtained for 14 single cells. Further geometry optimization of the single cell was done using the *CASTEP* module with *Ultra-fine* for *Quality*, GGA-PBE chosen for generalization, *Non-polarized*, truncation energy of 570.00 eV, *Pseudopotentials* of OTFG ultrasoft, *Relativistic treatment* is Koeling-Hamon, and quantum mechanical geometry optimization results for 14 single cells are obtained. The energy band structure of the optimized single cell was calculated using the *DMol3* module, with the generalized function chosen as GGA-PBE and the *Quality* as *Fine*2,3. According to the cell symmetry, the k-point path is set as R (0.5 0.5 0.5) – (0 0 0) – X (0.5 0 0) – M (0.5 0.5 0) – R (0.5 0.5 0.5) – X (0.5 0 0) – M (0.5 0.5 0) – (0 0 0) in inverted space, and the energy band structure as well as the bandgap values of the 14 single cells are obtained. On the basis of single cells that have been structurally optimized, 10 × 10 × 2 supercells are built to calculate the interlayer interactions of the crystals. Dynamics calculations were done for the supercell using the *Forcite* module, with *Universal* selected for the force field, NVT coefficient, *Initial velocities* of *Random*, *Temperature* of 343 K, *Time step* of 1.0 fs, *Total simulation time* of 50.0 ps, *Number of step* is 50000, and the kinetic results of 14 2D perovskite supercells at 70 ℃ are obtained. A total of 2 frames were generated from the initial state to the 70 ℃ steady state. The binding energy between the two ligands between octahedral layers is calculated using a script that sets the two ligands as Layer 1 and Layer 2, respectively, to obtain the binding energy between the two layers of ligands and ultimately takes the average of the two frames' binding energy values.

Table S1. Dilution parameters for high-throughput experiments

| Perovskite | Dilution factors | Stock Solution (μL) | Anti-solvent (μL) |
| --- | --- | --- | --- |
| (t-BA)2PbI4 (i-PA)2PbI4 (PA)2PbI4 (BA)2PbI4 (PentA)2PbI4 (HA)2PbI4 (OA)2PbI4 (NonylA)2PbI4 (DDA)2PbI4 | 60 | 10 | 600 |
| 120 | 10 | 1200 |
| 240 | 10 | 2400 |
| 480 | 5 | 2400 |
| 560 | 5 | 2800 |
| 640 | 5 | 3200 |
| 960 | 5 | 4800 |
| (PhA)2PbI4 (PMA)2PbI4 (PEA)2PbI4 (PPA)2PbI4 (PBA)2PbI4 | 30 | 20 | 600 |
| 60 | 10 | 600 |
| 90 | 10 | 900 |
| 120 | 10 | 1200 |
| 180 | 10 | 1800 |
| 240 | 10 | 2400 |
| 480 | 5 | 2400 |

Table S2. Kinetic results for 70 ℃ solution system

|  |  | Tot. energy (kcal/mol) | Pot. energy (kcal/mol) | Kin. energy (kcal/mol) | Tot. enthalpy (kcal/mol) | Temperature (K) | Pressure (GPa) | Volume (A^3) | Density (g/cm^3) | Eint  (A+-CB)  (kcal/mol) |
| --- | --- | --- | --- | --- | --- | --- | --- | --- | --- | --- |
| t-BA | Initial | 5720.089 | -8934.208 | 14654.296 | 11227.216 | 343 | 0.196 | 195492.9 | 1.115 | -16705.76 |
| Final | 18084.572 | 3393.223 | 14691.348 | 22459.321 | 343.867 | 0.155 | 195492.9 | 1.115 |
| Average | 18154.071 | 3499.622 | 14654.449 | 23250.097 | 343.004 | 0.181 | 195492.9 | 1.115 |
| Std. Dev. | 1709.181 | 783.31 | 959.441 | 3685.76 | 22.457 | 0.098 | 0 | 0 |
| i-PA | Initial | 6187.162 | -8436.461 | 14623.624 | 12411.975 | 343 | 0.221 | 195284 | 1.115 | -16691.46 |
| Final | 18309.96 | 3587.584 | 14722.376 | 19765.886 | 345.316 | 0.052 | 195284 | 1.115 |
| Average | 18312.935 | 3689.166 | 14623.77 | 23317.485 | 343.003 | 0.178 | 195284 | 1.115 |
| Std. Dev. | 1683.947 | 771.215 | 947.883 | 3686.928 | 22.233 | 0.099 | 0 | 0 |
| PA | Initial | 5127.63 | -9495.994 | 14623.624 | 6869.374 | 343 | 0.062 | 195284 | 1.115 | -16969.56 |
| Final | 18625.004 | 4010.842 | 14614.162 | 19307.695 | 342.778 | 0.024 | 195284 | 1.115 |
| Average | 18525.964 | 3902.245 | 14623.718 | 23380.293 | 343.002 | 0.173 | 195284 | 1.115 |
| Std. Dev. | 1729.152 | 805.537 | 959.044 | 3697.299 | 22.495 | 0.098 | 0 | 0 |
| BA | Initial | 6272.024 | -8382.272 | 14654.296 | 11532.634 | 343 | 0.187 | 195492.9 | 1.115 | -16923.01 |
| Final | 18632.253 | 3867.181 | 14765.072 | 23541.391 | 345.593 | 0.174 | 195492.9 | 1.115 |
| Average | 18499.708 | 3845.465 | 14654.243 | 23550.169 | 342.999 | 0.179 | 195492.9 | 1.115 |
| Std. Dev. | 1696.989 | 775.981 | 954.417 | 3748.195 | 22.339 | 0.101 | 0 | 0 |
| PentA | Initial | 6129.991 | -8554.977 | 14684.969 | 11842.038 | 343 | 0.203 | 195701.8 | 1.115 | -16968.14 |
| Final | 18765.593 | 4031.177 | 14734.416 | 22163.455 | 344.155 | 0.121 | 195701.8 | 1.115 |
| Average | 18541.411 | 3856.4 | 14685.012 | 23725.896 | 343.001 | 0.184 | 195701.8 | 1.115 |
| Std. Dev. | 1709.491 | 780.553 | 961.743 | 3740.334 | 22.464 | 0.099 | 0 | 0 |
| HA | Initial | 6180.746 | -8534.895 | 14715.641 | 11128.682 | 343 | 0.175 | 195910.7 | 1.115 | -17054.99 |
| Final | 18842.755 | 4068.316 | 14774.439 | 20661.776 | 344.37 | 0.065 | 195910.7 | 1.115 |
| Average | 18561.308 | 3845.636 | 14715.672 | 23867.161 | 343.001 | 0.188 | 195910.7 | 1.115 |
| Std. Dev. | 1717.999 | 785.066 | 965.609 | 3739.526 | 22.507 | 0.099 | 0 | 0 |
| OA | Initial | 6042.67 | -8734.316 | 14776.986 | 12940.509 | 343 | 0.244 | 196328.5 | 1.115 | -17172.38 |
| Final | 18501.044 | 3765.341 | 14735.703 | 20185.983 | 342.042 | 0.06 | 196328.5 | 1.115 |
| Average | 18606.604 | 3829.461 | 14777.144 | 23723.909 | 343.004 | 0.181 | 196328.5 | 1.115 |
| Std. Dev. | 1748.74 | 801.368 | 980.406 | 3811.011 | 22.757 | 0.102 | 0 | 0 |
| NonylA | Initial | 6150.474 | -8687.857 | 14838.331 | 12750.362 | 343 | 0.233 | 196746.3 | 1.115 | -17277.29 |
| Final | 18826.391 | 3962.837 | 14863.554 | 21341.23 | 343.583 | 0.089 | 196746.3 | 1.115 |
| Average | 18672.633 | 3834.459 | 14838.174 | 23974.635 | 342.996 | 0.187 | 196746.3 | 1.115 |
| Std. Dev. | 1704.322 | 779.927 | 956.443 | 3756.2 | 22.109 | 0.1 | 0 | 0 |
| DDA | Initial | 6068.723 | -8830.953 | 14899.676 | 12859.843 | 343 | 0.239 | 197164.1 | 1.115 | -17372.68 |
| Final | 18789.143 | 4063.724 | 14725.418 | 20775.876 | 338.988 | 0.07 | 197164.1 | 1.115 |
| Average | 18689.028 | 3789.335 | 14899.693 | 23943.875 | 343 | 0.185 | 197164.1 | 1.115 |
| Std. Dev. | 1754.764 | 804.958 | 983.338 | 3814.415 | 22.637 | 0.101 | 0 | 0 |
| PhA | Initial | 6377.229 | -8256.619 | 14633.848 | 12880.881 | 343 | 0.231 | 195790.6 | 1.115 | -16921.04 |
| Final | 18655.502 | 4032.91 | 14622.592 | 20901.546 | 342.736 | 0.08 | 195790.6 | 1.115 |
| Average | 18490.281 | 3856.329 | 14633.952 | 23593.557 | 343.002 | 0.181 | 195790.6 | 1.115 |
| Std. Dev. | 1660.158 | 759.022 | 934.923 | 3751.386 | 21.913 | 0.103 | 0 | 0 |
| PMA | Initial | 6377.232 | -8287.288 | 14664.52 | 11066.229 | 343 | 0.166 | 195999.5 | 1.115 | -17061.64 |
| Final | 18943.67 | 4131.077 | 14812.593 | 22073.859 | 346.463 | 0.111 | 195999.5 | 1.115 |
| Average | 18740.983 | 4076.733 | 14664.25 | 23750.592 | 342.994 | 0.178 | 195999.5 | 1.115 |
| Std. Dev. | 1697.75 | 775.471 | 955.533 | 3718.527 | 22.35 | 0.099 | 0 | 0 |
| PEA | Initial | 6090.576 | -8604.617 | 14695.193 | 10549.724 | 343 | 0.158 | 196208.4 | 1.115 | -17060.15 |
| Final | 18604.826 | 3969.199 | 14635.626 | 21461.961 | 341.61 | 0.101 | 196208.4 | 1.115 |
| Average | 18600.047 | 3904.959 | 14695.088 | 23568.851 | 342.998 | 0.176 | 196208.4 | 1.115 |
| Std. Dev. | 1735.378 | 790.917 | 979.914 | 3726.139 | 22.872 | 0.1 | 0 | 0 |
| PPA | Initial | 6175.587 | -8550.279 | 14725.865 | 13099.544 | 343 | 0.245 | 196417.3 | 1.115 | -17035.26 |
| Final | 18661.543 | 3994.651 | 14666.892 | 21201.922 | 341.626 | 0.09 | 196417.3 | 1.115 |
| Average | 18628.386 | 3902.607 | 14725.78 | 23767.436 | 342.998 | 0.182 | 196417.3 | 1.115 |
| Std. Dev. | 1719.915 | 787.496 | 966.281 | 3772.868 | 22.507 | 0.101 | 0 | 0 |
| PBA | Initial | 6384.052 | -8372.486 | 14756.538 | 12033.805 | 343 | 0.2 | 196626.2 | 1.115 | -17182.99 |
| Final | 18580.374 | 3857.149 | 14723.225 | 23453.016 | 342.226 | 0.172 | 196626.2 | 1.115 |
| Average | 18673.549 | 3916.659 | 14756.89 | 23691.221 | 343.008 | 0.177 | 196626.2 | 1.115 |
| Std. Dev. | 1718.016 | 786.352 | 964.851 | 3791.939 | 22.427 | 0.101 | 0 | 0 |

Table S3. TrPL fitting results of 2D perovskite thin film

The tail index model was fitted according to the following equation:

|  | A1  (kCnts/Chnl) | τ1(ns) | A2  (kCnts/Chnl) | τ2(ns) | A3  (kCnts/Chnl) | τ3(ns) | τAvInt(ns) | ∆ |
| --- | --- | --- | --- | --- | --- | --- | --- | --- |
| (t-BA)2PbI4 | 0.417 | 2.78 | 0.052 | 20 | 0.052 | 0.25 | 11.52 | ±0.97 |
| (i-PA)2PbI4 | 4.26 | 0.7 | 71 | 0.1059 | 0.0383 | 6.83 | 0.434 | ±0.011 |
| (PA)2PbI4 | 4.23 | 0.692 | 70.8 | 0.1122 | 0.0282 | 6.75 | 0.38 | ±0.011 |
| (BA)2PbI4 | 30.4 | 0.832 | 48.9 | 0.0825 | 0.0532 | 9.3 | 0.871 | ±0.033 |
| (PentA)2PbI4 | 63.1 | 0.1263 | 9.02 | 0.6199 | 0.0525 | 5.43 | 0.4522 | ±0.0081 |
| (HA)2PbI4 | 0.182 | 4.5 | 31.07 | 0.6978 | 49.4 | 0.1199 | 0.6867 | ±0.0065 |
| (OA)2PbI4 | 0.784 | 5.037 | 46.1 | 0.7049 | 228.5 | 0.1585 | 0.6678 | ±0.0038 |
| (NonylA)2PbI4 | 9.38 | 0.6208 | 69.4 | 0.1421 | 0.106 | 4.62 | 0.45 | ±0.0040 |
| (DDA)2PbI4 | 17.83 | 0.6017 | 59.89 | 0.159 | 0.095 | 5.49 | 0.5214 | ±0.0027 |
| (PhA)2PbI4 | 0.877 | 0.759 | 6.83 | 0.1581 | -- | -- | 0.3871 | ±0.0077 |
| (PMA)2PbI4 | 0.58 | 6.08 | 30.03 | 0.743 | 220.7 | 0.1415 | 0.7426 | ±0.0049 |
| (PEA)2PbI4 | 0.71 | 3.8 | 40 | 0.634 | 10 | 0.638 | 0.98 | ±0.26 |
| (PPA)2PbI4 | 0.347 | 9.03 | 58.1 | 0.34 | 18.3 | 1 | 1.295 | ±0.013 |
| (PBA)2PbI4 | 1.354 | 5.834 | 52.7 | 0.1833 | 28.45 | 1.043 | 1.6683 | ±0.0050 |

Table S4. Lattice constants of two-dimensional perovskite single-cell lattices

|  | a | b | c | α | β | γ |
| --- | --- | --- | --- | --- | --- | --- |
| (t-BA)2PbI4 | 9.16792 | 9.10868 | 27.0723 | 90 | 90 | 90 |
| (i-PA)2PbI4 | 8.74666 | 8.68723 | 26.4522 | 90 | 90 | 90 |
| (PA)2PbI4 | 8.90185 | 8.29938 | 27.6405 | 90 | 90 | 90 |
| (BA)2PbI4 | 8.29302 | 9.14469 | 30.2634 | 90 | 90 | 90 |
| (PentA)2PbI4 | 8.46981 | 9.06835 | 31.7255 | 90 | 90 | 90 |
| (HA)2PbI4 | 8.61881 | 9.47353 | 30.7827 | 90 | 90 | 90 |
| (OA)2PbI4 | 8.71863 | 10.0919 | 37.9609 | 90 | 90 | 90 |
| (NonylA)2PbI4 | 9.43487 | 9.05393 | 41.9987 | 90 | 90 | 90 |
| (DDA)2PbI4 | 9.93661 | 8.71744 | 45.4956 | 90 | 90 | 90 |
| (PhA)2PbI4 | 8.13688 | 9.21129 | 31.2489 | 90 | 90 | 90 |
| (PMA)2PbI4 | 8.54218 | 8.59372 | 34.5863 | 90 | 90 | 90 |
| (PEA)2PbI4 | 8.61029 | 8.75766 | 37.6427 | 90 | 90 | 90 |
| (PPA)2PbI4 | 8.37027 | 9.06493 | 42.9779 | 90 | 90 | 90 |
| (PBA)2PbI4 | 9.05059 | 9.06976 | 36.6075 | 90 | 90 | 90 |

Table S5. Layer spacing and ligand molecular space size

|  | L size (Å) | c (Å) | Pb-I (Å) | Interlayer spacing (Å)  (c/2-[Pb-I]×2) | Ratio |
| --- | --- | --- | --- | --- | --- |
| (t-BA)2PbI4 | 3.428 | 27.0723 | 3.213 | 7.11015 | 2.074 |
| (i-PA)2PbI4 | 3.433 | 26.4522 | 3.229 | 6.7681 | 1.971 |
| (PA)2PbI4 | 4.663 | 27.6405 | 3.246 | 7.32825 | 1.572 |
| (BA)2PbI4 | 5.941 | 30.2634 | 3.222 | 8.6877 | 1.462 |
| (PentA)2PbI4 | 7.207 | 31.7255 | 3.212 | 9.43875 | 1.310 |
| (HA)2PbI4 | 7.512 | 30.7827 | 3.197 | 8.99735 | 1.198 |
| (OA)2PbI4 | 10.238 | 37.9609 | 3.185 | 12.61045 | 1.232 |
| (NonylA)2PbI4 | 12.295 | 41.9987 | 3.202 | 14.59535 | 1.187 |
| (DDA)2PbI4 | 16.101 | 45.4956 | 3.229 | 16.2898 | 1.012 |
| (PhA)2PbI4 | 5.321 | 31.2489 | 3.209 | 9.20645 | 1.730 |
| (PMA)2PbI4 | 6.09 | 34.5863 | 3.238 | 10.81715 | 1.776 |
| (PEA)2PbI4 | 7.614 | 37.6427 | 3.27 | 12.28135 | 1.613 |
| (PPA)2PbI4 | 8.551 | 42.9779 | 3.286 | 14.91695 | 1.744 |
| (PBA)2PbI4 | 9.762 | 36.6075 | 3.201 | 11.90175 | 1.219 |

Table S6. Supercell interlayer binding energy

|  | Frame | Energy of PVK Cell (kcal/mol) | Energy of layer 1 (kcal/mol) | Energy of layer 2 (kcal/mol) | Interaction Energy (kcal/mol) | Average Interaction Energy (kcal/mol) |
| --- | --- | --- | --- | --- | --- | --- |
| (t-BA)2PbI4 | 1 | 261988.1 | 261331.2 | 261331.2 | -260674.4 | -231000 |
| 2 | 210134.8 | 205914.6 | 205906 | -201394.9 |
| (i-PA)2PbI4 | 1 | 216084.3 | 215570.6 | 215570.6 | -215056.9 | -186000 |
| 2 | 166867 | 162190.3 | 161952.2 | -157275.5 |
| (PA)2PbI4 | 1 | 205802.9 | 204847.4 | 204847.4 | -203891.9 | -178000 |
| 2 | 159337.5 | 155428.6 | 155440.3 | -151531.4 |
| (BA)2PbI4 | 1 | 210202 | 210540.2 | 210540.2 | -210878.3 | -185000 |
| 2 | 167134.2 | 162935.6 | 162666.5 | -158467.9 |
| (PentA)2PbI4 | 1 | 218769.9 | 217808.3 | 217808.3 | -216846.7 | -192000 |
| 2 | 176977.6 | 171859.7 | 171803.8 | -166685.9 |
| (HA)2PbI4 | 1 | 242209.5 | 241958 | 241958 | -241706.5 | -217000 |
| 2 | 203104.8 | 198217.5 | 198116.4 | -193229.2 |
| (OA)2PbI4 | 1 | 258284.7 | 258645.7 | 258645.7 | -259006.8 | -249000 |
| 2 | 244292.2 | 241874.1 | 241812.4 | -239394.3 |
| (NonylA)2PbI4 | 1 | 287536.2 | 287640.9 | 287640.9 | -287745.6 | -262000 |
| 2 | 244337 | 240087.5 | 239853.4 | -235603.9 |
| (DDA)2PbI4 | 1 | 253765.2 | 254770.2 | 254770.2 | -255775.1 | -243000 |
| 2 | 236058.6 | 232942.9 | 232886.4 | -229770.7 |
| (PhA)2PbI4 | 1 | 254746.6 | 252115.1 | 252115.1 | -249483.6 | -214000 |
| 2 | 190894.5 | 184334 | 184373.6 | -177813.1 |
| (PMA)2PbI4 | 1 | 217551.6 | 215237.6 | 215237.6 | -212923.6 | -187000 |
| 2 | 171105.2 | 165520.3 | 165764.3 | -160179.3 |
| (PEA)2PbI4 | 1 | 212240.3 | 211251.6 | 211251.6 | -210262.9 | -187000 |
| 2 | 174012 | 169292.2 | 169157.1 | -164437.2 |
| (PPA)2PbI4 | 1 | 225534 | 223680 | 223680 | -221825.9 | -202000 |
| 2 | 192489.6 | 187433 | 187398.3 | -182341.7 |
| (PBA)2PbI4 | 1 | 237651.7 | 238294.5 | 238294.5 | -238937.2 | -219000 |
| 2 | 208999.9 | 204305.2 | 204180 | -199485.3 |

Table S7. Bandgap Calculated vs. PL Tested

The error range of the band gap value was obtained by expanding the calculated band gap value according to the error size of the GGA-PBE generalized function, i.e., 30%~50%, and the experimental band gap value calculated according to the peak position of the photoluminescence spectra was within this error range. The accuracy of the Forcite and CASTEP geometry optimization results can be demonstrated.

|  | GGA-PBE  (eV) | / (1-30%) | / (1-50%) | PL test (nm) | Experimental Bandgap (eV) |
| --- | --- | --- | --- | --- | --- |
| (t-BA)2PbI4 | 1.407 | 2.010 | 2.814 | 538 | 1.903 |
| (i-PA)2PbI4 | 1.592 | 2.274 | 3.184 | 498 | 2.056 |
| (PA)2PbI4 | 1.229 | 1.756 | 2.458 | 505 | 2.028 |
| (BA)2PbI4 | 1.246 | 1.78 | 2.492 | 538 | 1.903 |
| (PentA)2PbI4 | 1.254 | 1.791 | 2.508 | 526 | 1.947 |
| (HA)2PbI4 | 1.13 | 1.614 | 2.26 | 525 | 1.950 |
| (OA)2PbI4 | 1.201 | 1.716 | 2.402 | 521 | 1.965 |
| (NonylA)2PbI4 | 1.318 | 1.883 | 2.636 | 521 | 1.965 |
| (DDA)2PbI4 | 1.072 | 1.531 | 2.144 | 492 | 2.081 |
| (PhA)2PbI4 | 1.42 | 2.029 | 2.84 | 531 | 1.928 |
| (PMA)2PbI4 | 1.342 | 1.917 | 2.684 | 521 | 1.965 |
| (PEA)2PbI4 | 1.132 | 1.617 | 2.264 | 533 | 1.921 |
| (PPA)2PbI4 | 1.094 | 1.563 | 2.188 | 490 | 2.090 |
| (PBA)2PbI4 | 1.21 | 1.729 | 2.42 | 515 | 1.988 |

Table S8. (BA)2PbI4 and (PEA)2PbI4 single-crystal diffraction calibration

| index: (BA)2PbI4, PDF <96-210-2938> | | | | | | | | |
| --- | --- | --- | --- | --- | --- | --- | --- | --- |
| Image Number | R (1/Å) | d (Å) | d (Å) (card) | (hkl) | ∠R1OR2 (mea.) | ∠R1OR2 (cal.) | ∠R1OR3 (mea.) | ∠R1OR3 (cal.) |
| [0 1 0] | R1=0.1249 | d1=8.006 | d1=8.428 | (1 0 0) | θ=97.11° | θ=90° | θ=43.23° | θ=43.94° |
| R2=0.1796 | d2=5.567 | d2=6.558 | (0 0 4) |
| R3=0.1716 | d3=5.826 | d3=5.014 | (1 0 3) |

| index: (PEA)2PbI4, PDF <96-220-1647> | | | | | | | | |
| --- | --- | --- | --- | --- | --- | --- | --- | --- |
| Image Number | R (1/Å) | d (Å) | d (Å) (card) | (hkl) | ∠R1OR2 (mea.) | ∠R1OR2 (cal.) | ∠R1OR3 (mea.) | ∠R1OR3 (cal.) |
| [2 1 1] | R1=0.1736 | d1=5.761 | d1=6.122 |  | θ=88.85° | θ=88.65° | θ=43.88° | θ=43.22° |
| R2=0.1623 | d2=6.161 | d2=7.869 |  |
| R3=0.2275 | d3=4.396 | d3=5.718 |  |

**Fig. S1. Flowchart of high-throughput experiments and analysis.**


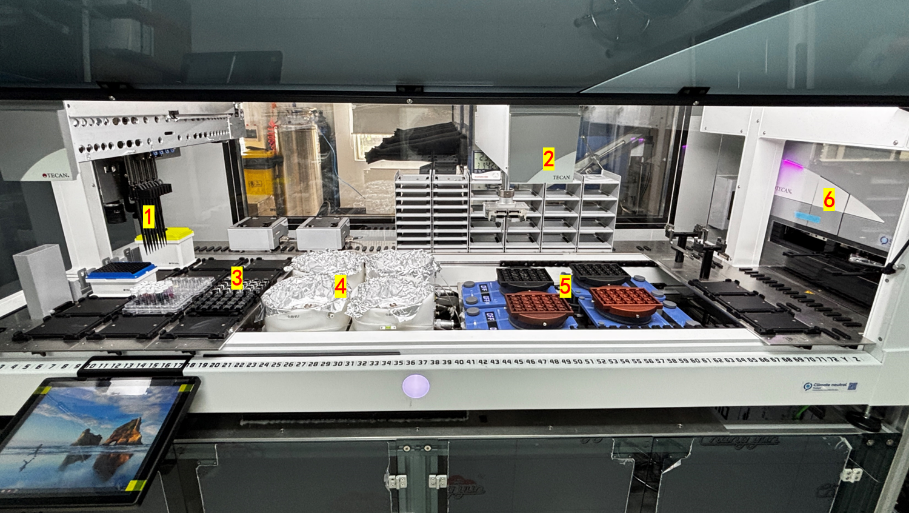


**Fig. S2. High-throughput Experimental Platform for Optoelectronic Materials.**

The platform integrates the following key components: 1 - Eight-channel liquid-handling robot, 2 - Robotic gripper arm, 3 - Glass substrate tray, 4 - Spin coater, 5 - Heating stage, 6 - Microplate reader.


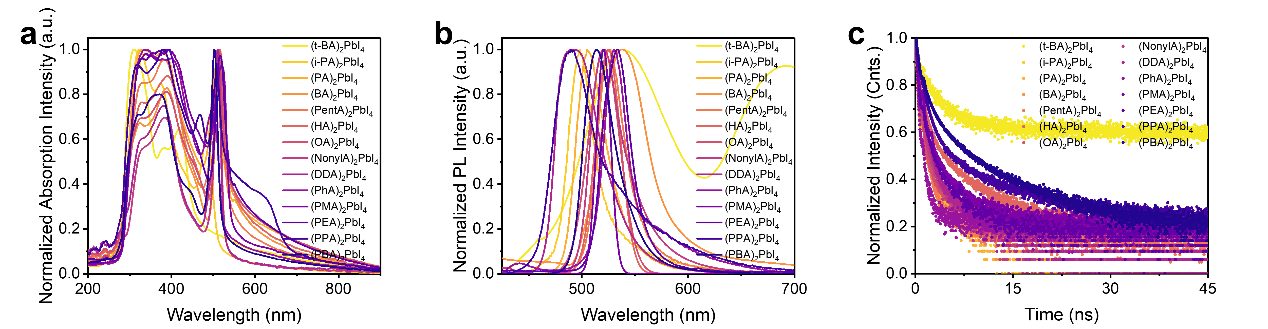


**Fig. S3. Characterization of the photovoltaic properties of two-dimensional perovskite thin films.**

**a**, UV-Vis absorption spectra of 14 2D perovskite films, the characteristic absorption peaks of 2D perovskite appeared at 450~550 nm, so the absorption peaks there were identified as perovskite crystals in the in-situ absorption analysis; **b**, PL spectra, **c**, TrPL spectra.


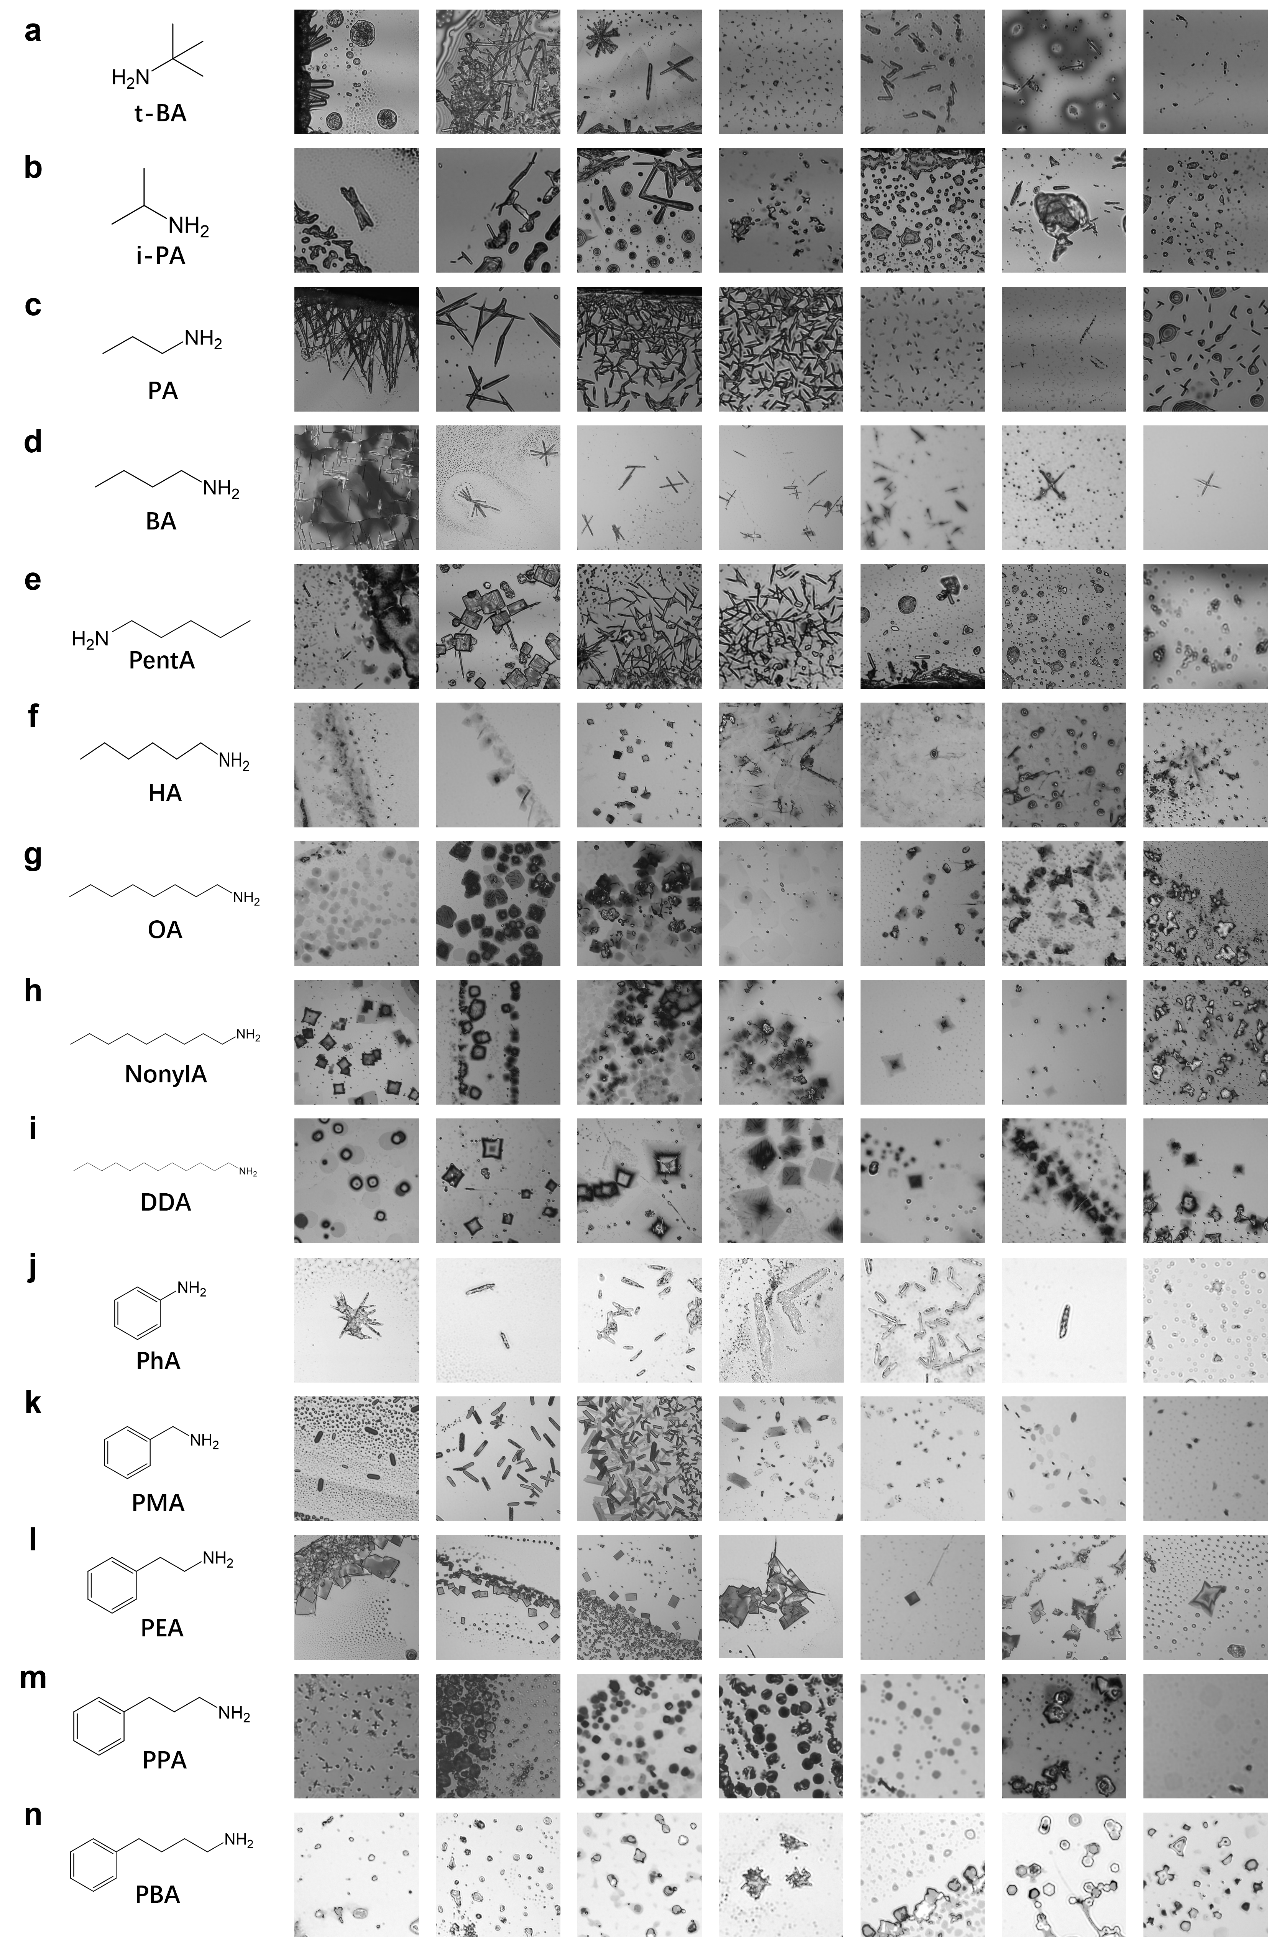


**Fig. S4. Crystallographic morphology of two-dimensional perovskite single crystals formed by each ligand at different dilution times.**

**a – i**, The alkylamine ligands (**a**) t-BA, (**b**) i-PA, (**c**) PA, (**d**) BA, (**e**) PentA, (**f**) HA, (**g**) OA, (**h**) NonylA, and (**i**) DDA were diluted 60, 120, 240, 480, 560, 640, and 960 times from left to right. **j – k**, The aromatic amine ligands (**j**) PhA, (**k**) PMA, (**l**) PEA, (**m**) PPA, (**n**) PBA were diluted 30, 60, 120, 180, 240, 480 times from left to right. From the 98 crystallization results, 14 characteristic crystals were screened out, corresponding to 14 of the ligands.


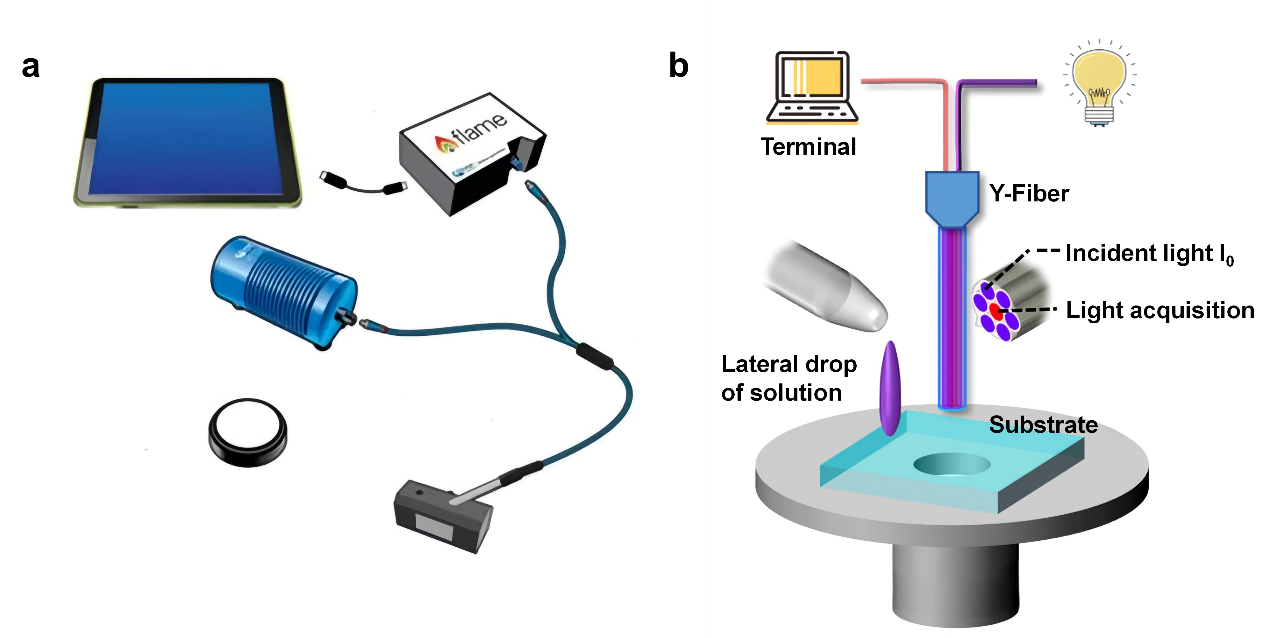


**Fig. S5. In situ UV-Vis absorption test system.**

**a**, In-situ absorption spectrum testing system consists of a white light source, spectrometer, Y-type optical fiber, sample holder, and a computer terminal. **b**, Schematic diagram for testing in-situ absorption spectra using reflectance mode. The white light source is an incident perpendicular to the substrate plane and the reflected light is collected by the center fiber. The test is performed by dropping the solution from the side, and the resulting spectral data is inverted and processed as the in-situ absorption spectrum of the sample.


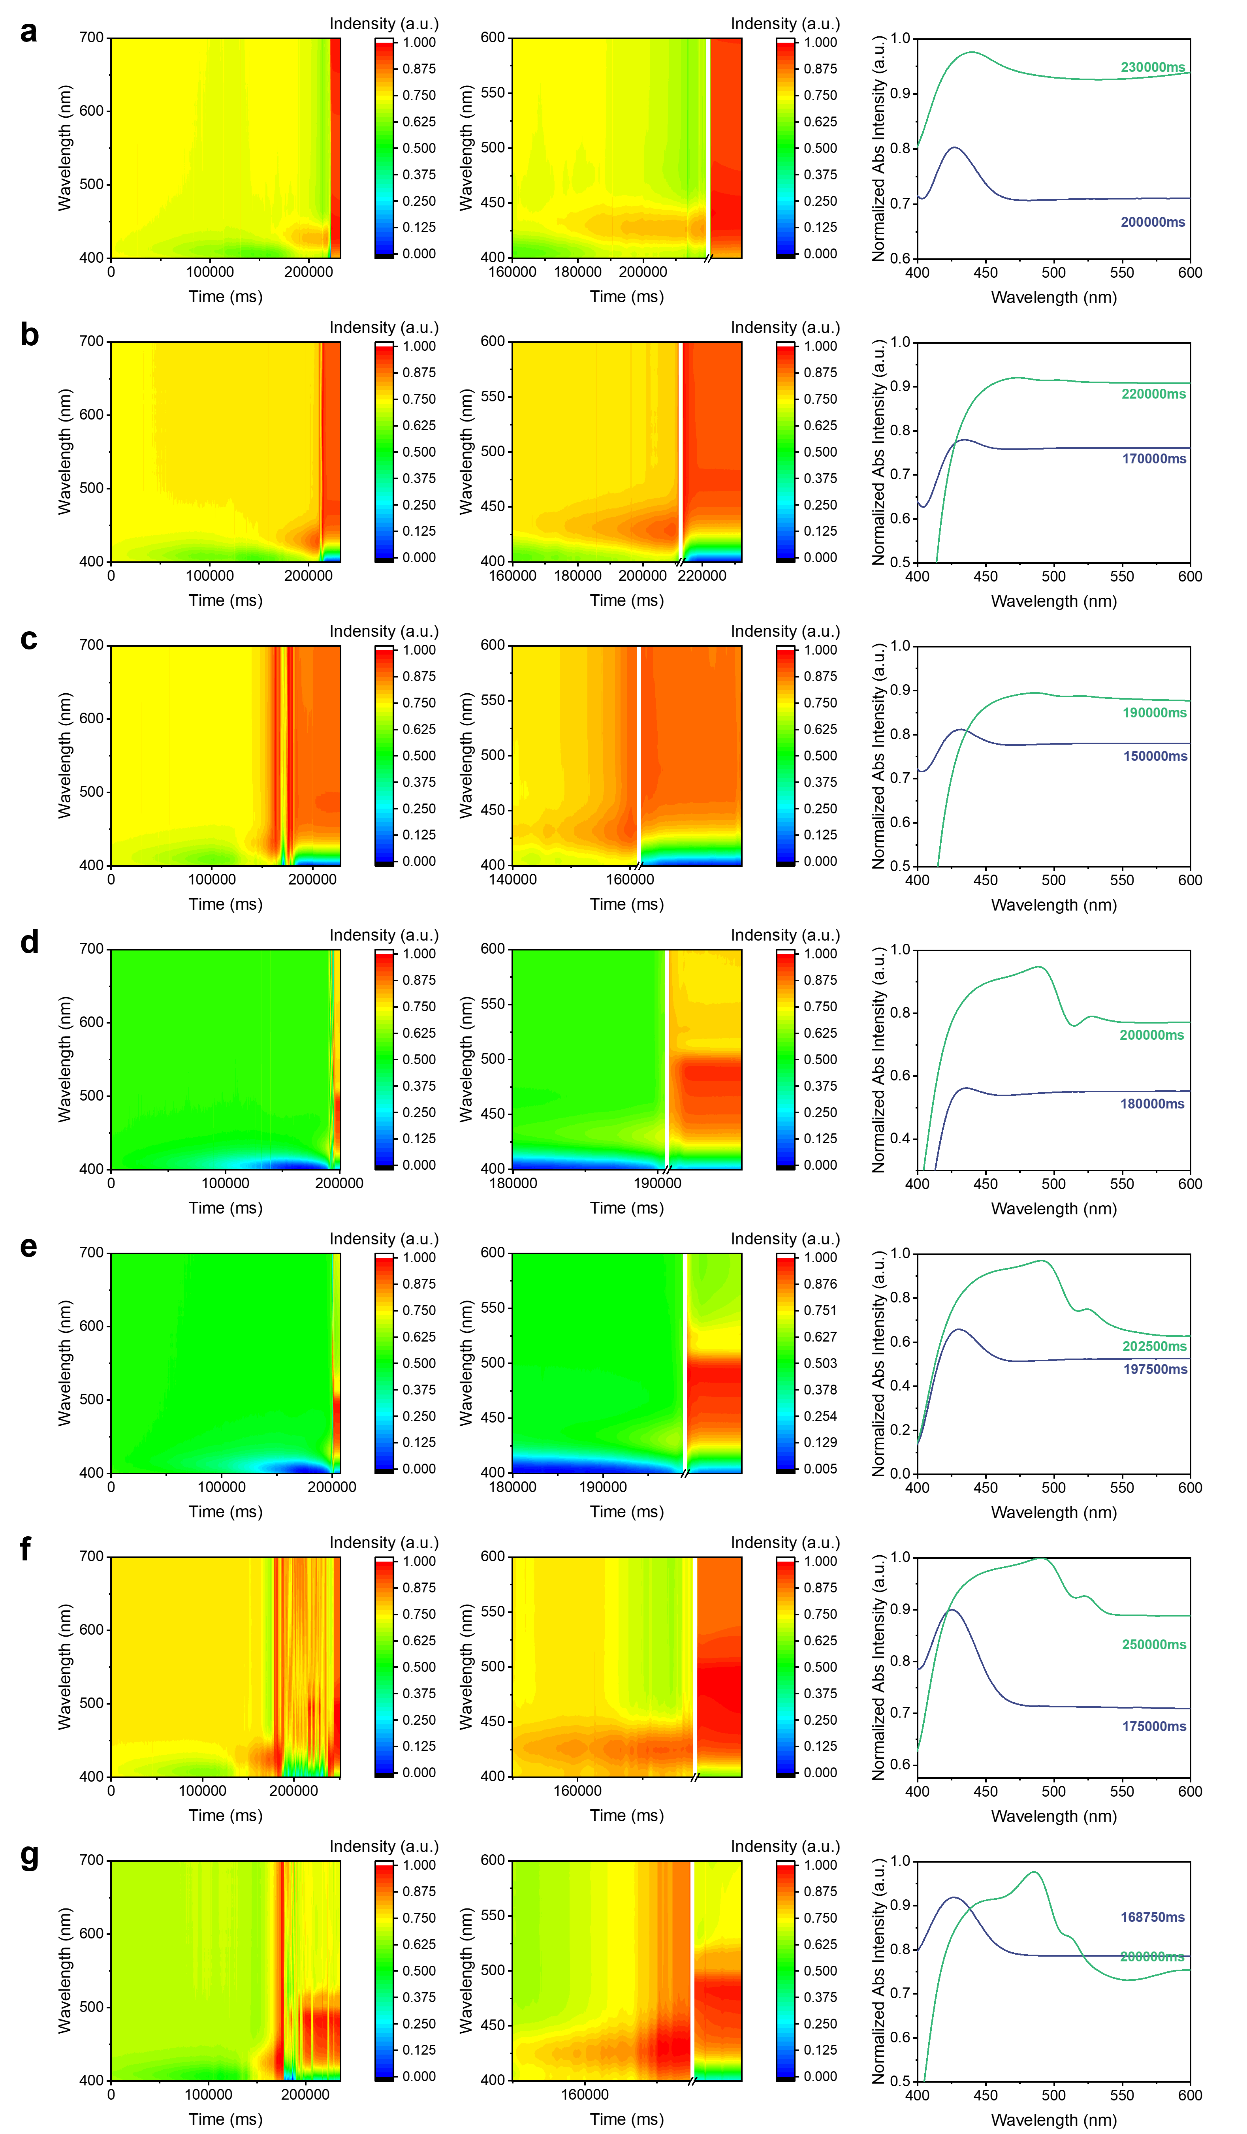

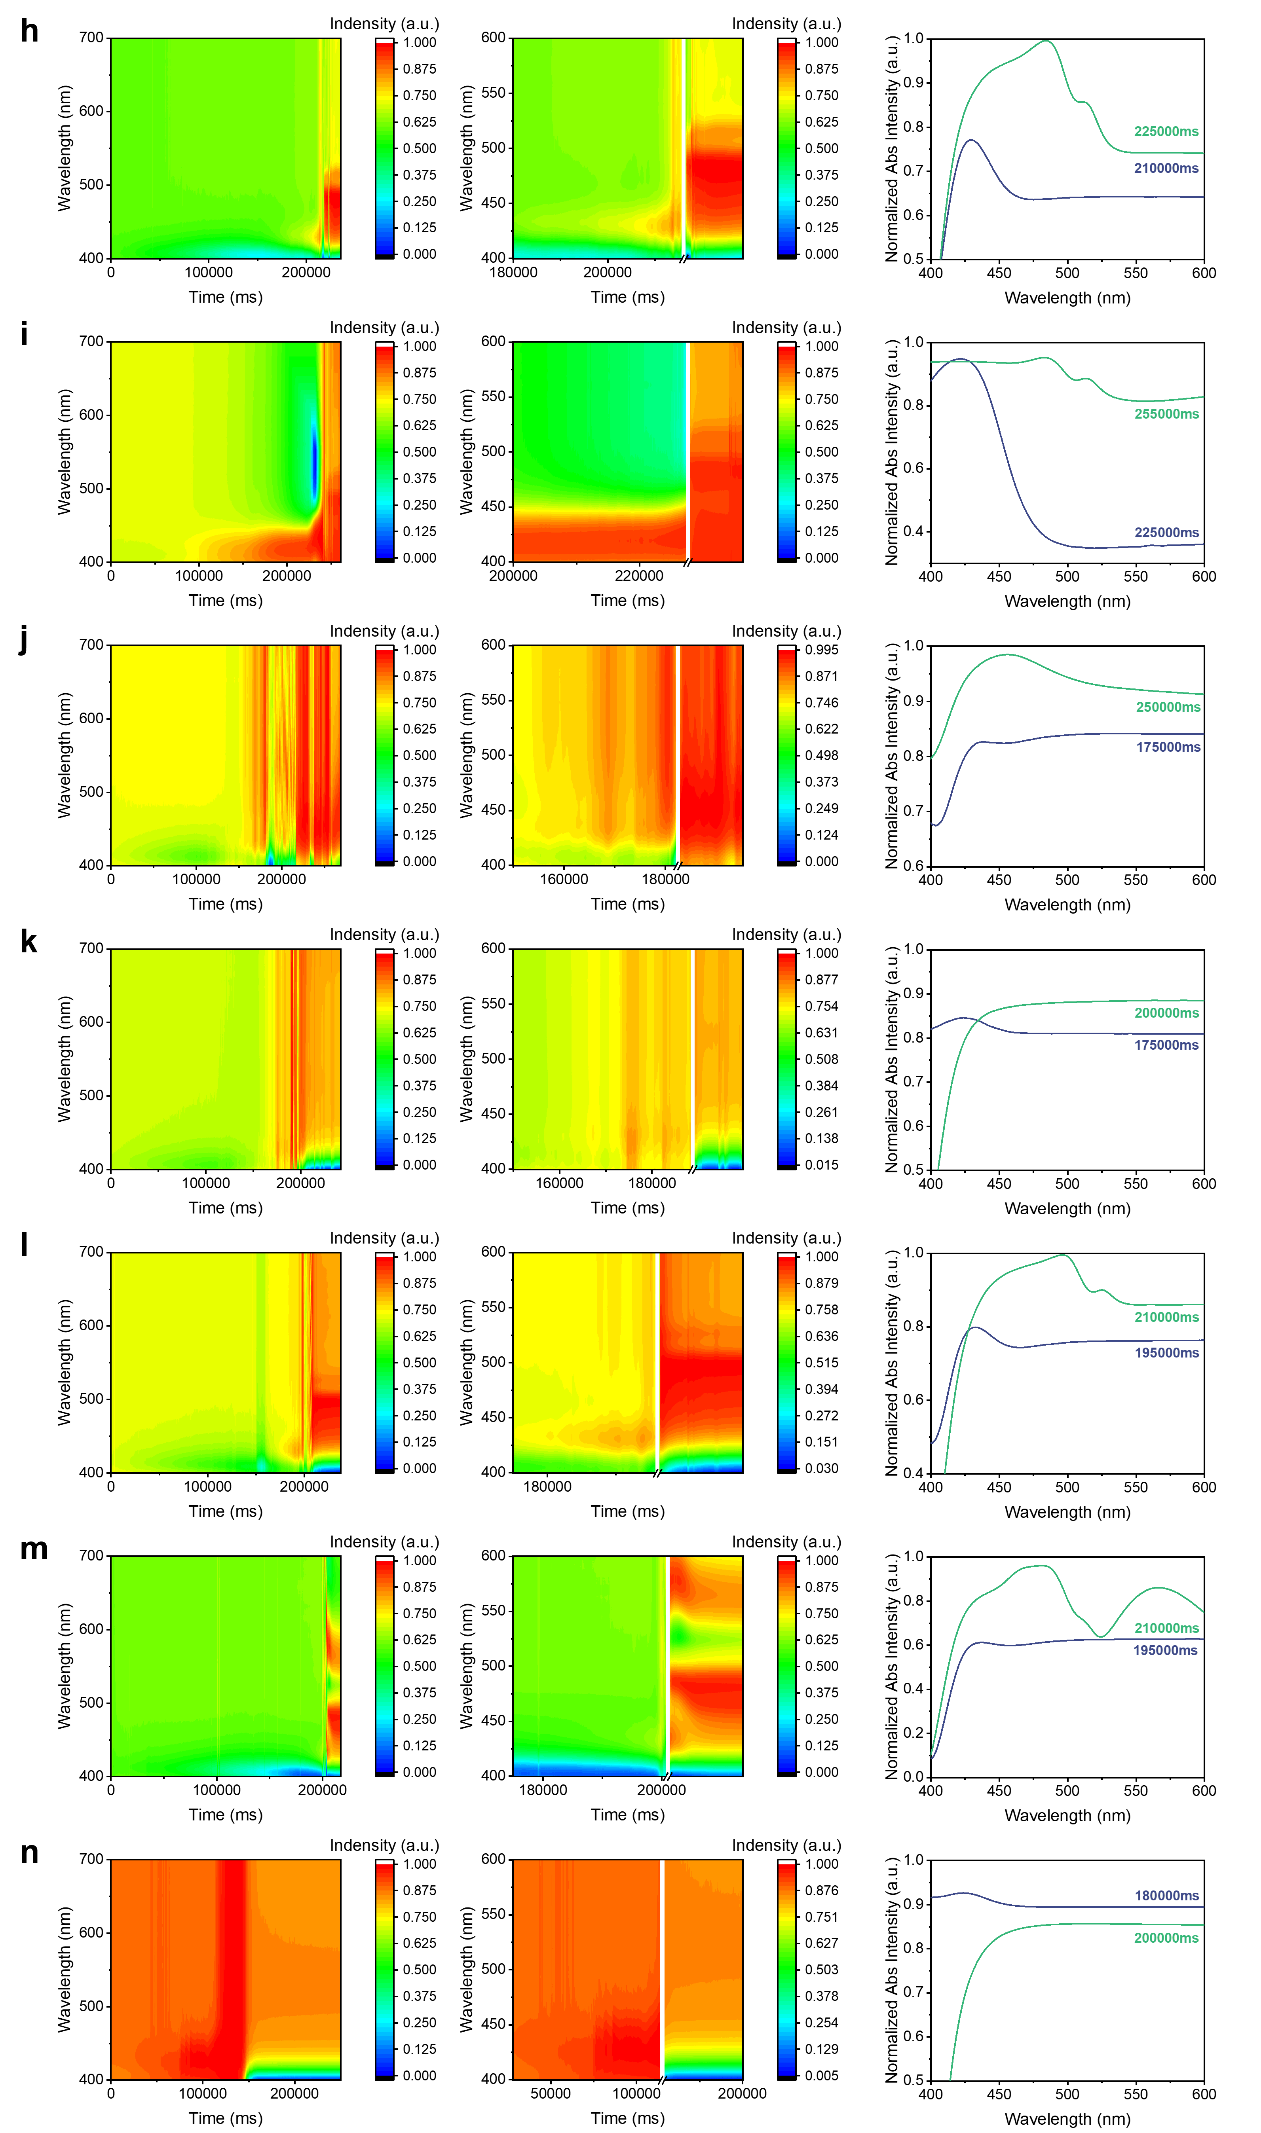


**Fig. S6. In situ absorption spectra of each solution of 5 mM during evaporation at 70 ℃.**

**a – n**, In situ absorption spectra of each solution of (**a**) (t-BA)2PbI4, (**b**) (i-PA)2PbI4, (**c**) (PA)2PbI4, (**d**) (BA)2PbI4, (**e**) (PentA)2PbI4, (**f**) (HA)2PbI4, (**g**) (OA)2PbI4, (**h**) (NonylA)2PbI4, (**i**) (DDA)2PbI4, (**j**) (PhA)2PbI4, (**k**) (PMA)2PbI4, (**l**) (PEA)2PbI4, (**m**) (PPA)2PbI4, (**n**) (PBA)2PbI4；The first figure shows the full in-situ absorption spectra, the second figure shows the amplified in-situ spectra of Stage I and Stage II (with the signal disturbance phase removed), and the third figure shows the absorption spectra under a single time point in Stage I and Stage II. It can be seen that in the alkane ligand system, the ligands with small site resistance (t-BA+~ PA+) all exhibit low PbI2 signals before the break, and both PbI2 and PVK signals are elevated after the break. In contrast, large site-blocking ligands (PentA+~NonylA+) exhibited stronger PbI2 signaling before the break and elevated PVK signaling after the break. For aromatic ligands (PhA+~PBA+), the small-site-resistance ligands (PhA+, PMA+) and large-site-resistance ligands (PEA+~PBA+) exhibit the same spectral characteristics as alkanes.


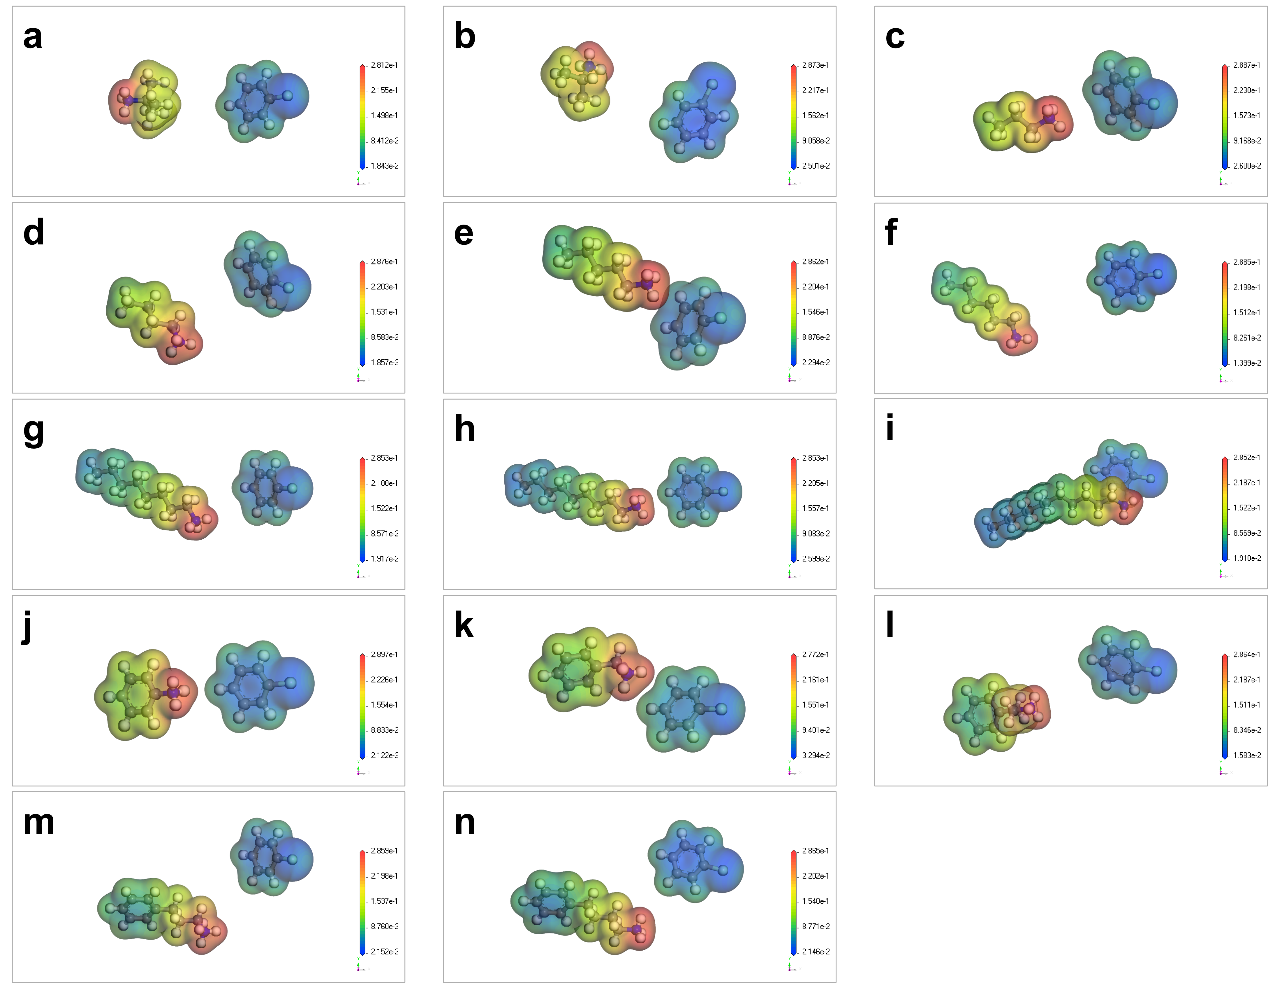


**Fig. S7. Space position configuration and electrostatic potential of each ligand ion with CB molecule.**

**a – n**, Space position configurations and electrostatic potentials of (**a**) (t-BA)2PbI4, (**b**) (i-PA)2PbI4, (**c**) (PA)2PbI4, (**d**) (BA)2PbI4, (**e**) (PentA)2PbI4, (**f**) (HA)2PbI4, (**g**) (OA)2PbI4, (**h**) (NonylA)2PbI4, (**i**) (DDA)2PbI4, (**j**) (PhA)2PbI4, (**k**) (PMA)2PbI4, (**l**) (PEA)2PbI4, (**m**) (PPA)2PbI4, (**n**) (PBA)2PbI4；Where red is the electrophilic end and blue is the nucleophilic end, the amino group of each ligand can interact with the Cl atom in the CB molecule in a mutually attractive manner.


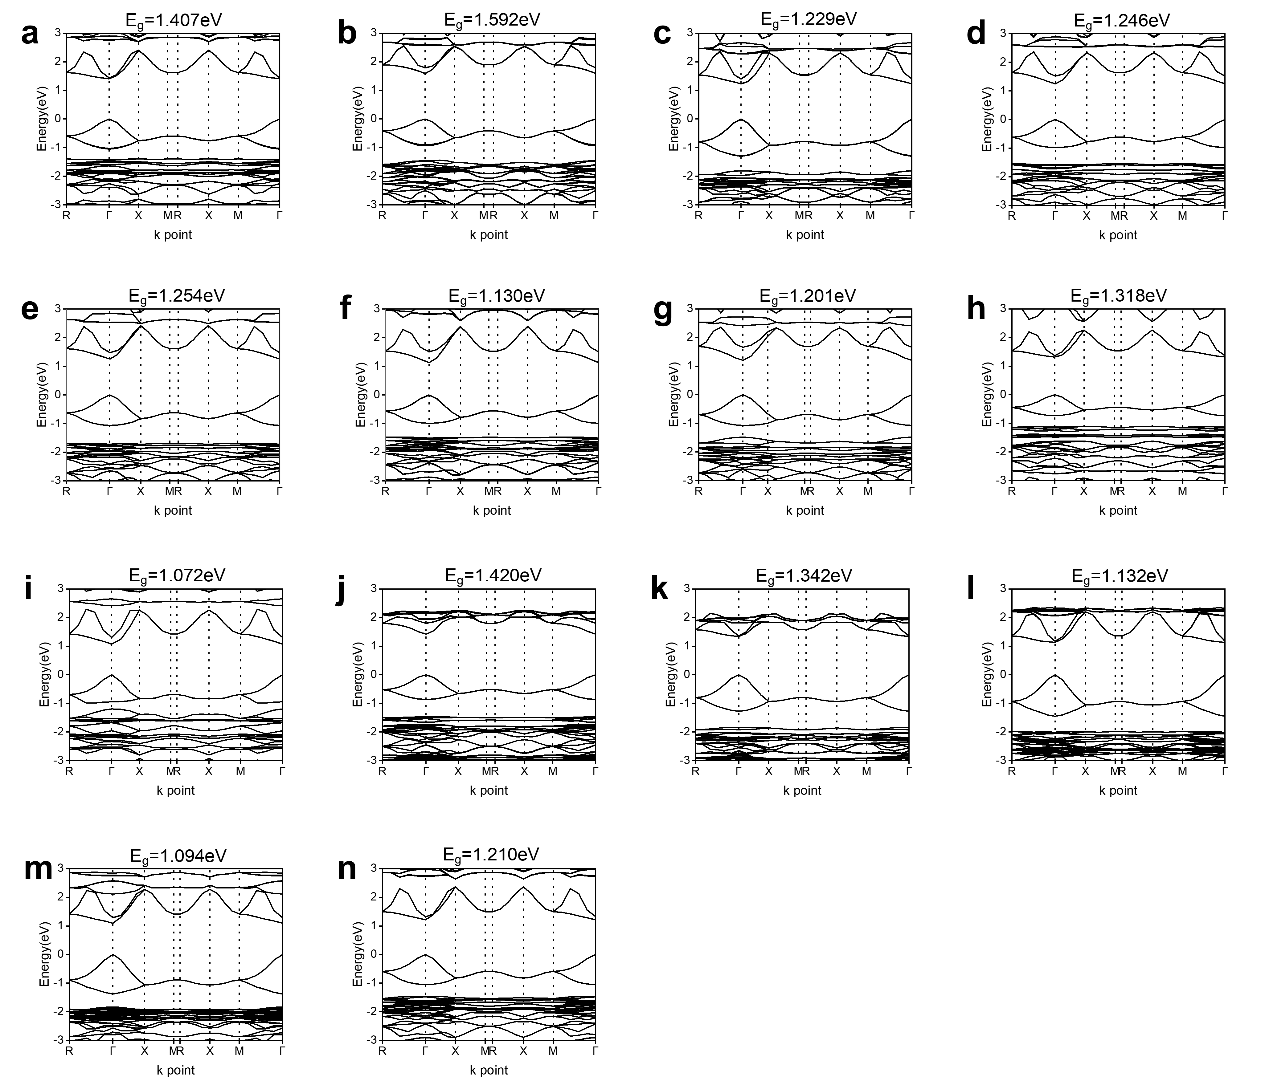


**Fig. S8. Calculation of the energy band structure of each two-dimensional perovskite singlet using GGA-PBE generalization.**

**a – n**, Band structures of (**a**) (t-BA)2PbI4, (**b**) (i-PA)2PbI4, (**c**) (PA)2PbI4, (**d**) (BA)2PbI4, (**e**) (PentA)2PbI4, (**f**) (HA)2PbI4, (**g**) (OA)2PbI4, (**h**) (NonylA)2PbI4, (**i**) (DDA)2PbI4, (**j**) (PhA)2PbI4, (**k**) (PMA)2PbI4, (**l**) (PEA)2PbI4, (**m**) (PPA)2PbI4, (**n**) (PBA)2PbI4；The PBE generalization underestimates the bandgap by 30% to 50%, so the calculated values are somewhat different from the actual test values.


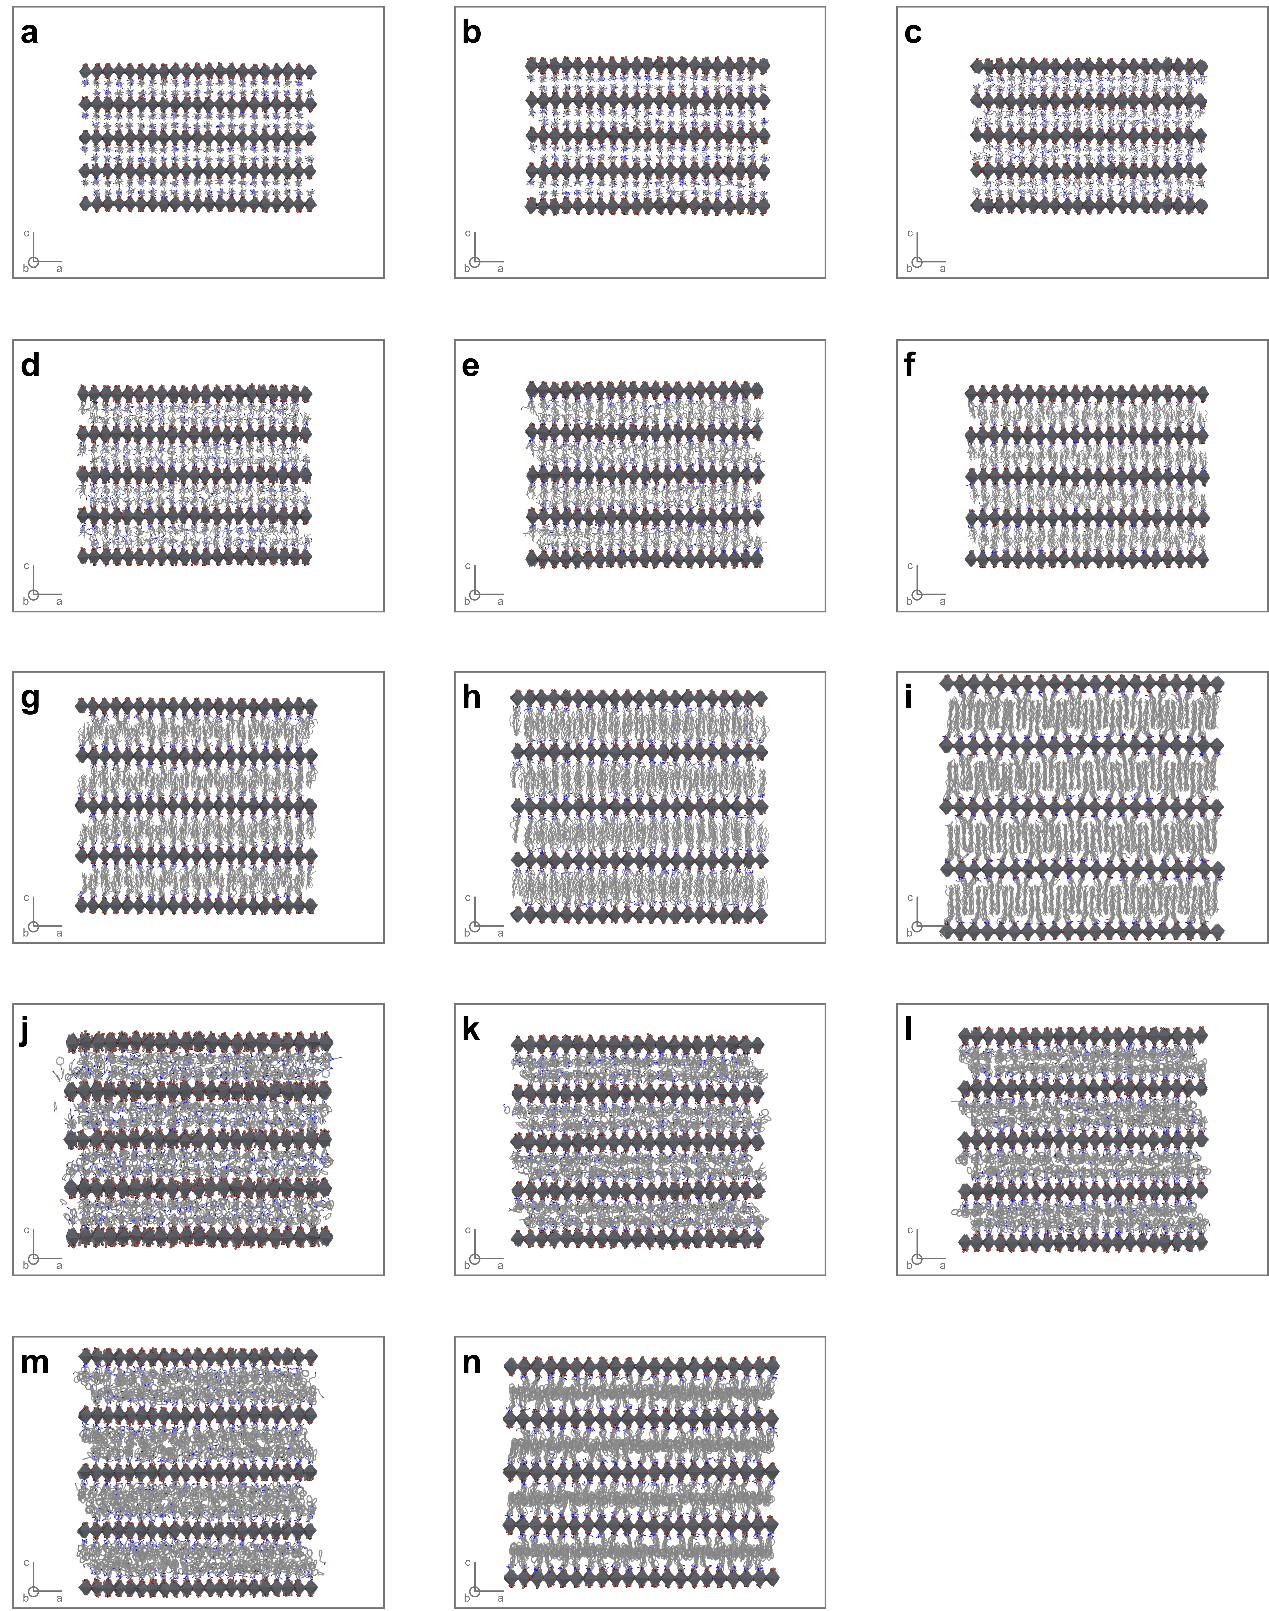


**Fig. S9. Simulation of the molecular morphology inside the crystals of 14 two-dimensional perovskite 10 × 10 × 2 supercells after kinetic calculations at 70 ℃.**

**a – n**, Supercells of (**a**) (t-BA)2PbI4, (**b**) (i-PA)2PbI4, (**c**) (PA)2PbI4, (**d**) (BA)2PbI4, (**e**) (PentA)2PbI4, (**f**) (HA)2PbI4, (**g**) (OA)2PbI4, (**h**) (NonylA)2PbI4, (**i**) (DDA)2PbI4, (**j**) (PhA)2PbI4, (**k**) (PMA)2PbI4, (**l**) (PEA)2PbI4, (**m**) (PPA)2PbI4, (**n**) (PBA)2PbI4; As the length of the ligand molecule increases, the spacing of the octahedral layers increases, the extent to which the ligand chains are interspersed with each other increases, and the ligand interlayer binding energy increases. For aromatic ligands, the octahedral layer spacing of (PBA)2PbI4 with longer chains is instead smaller than that of (PPA)2PbI4 due to the large degree of ligand chain intercalation.


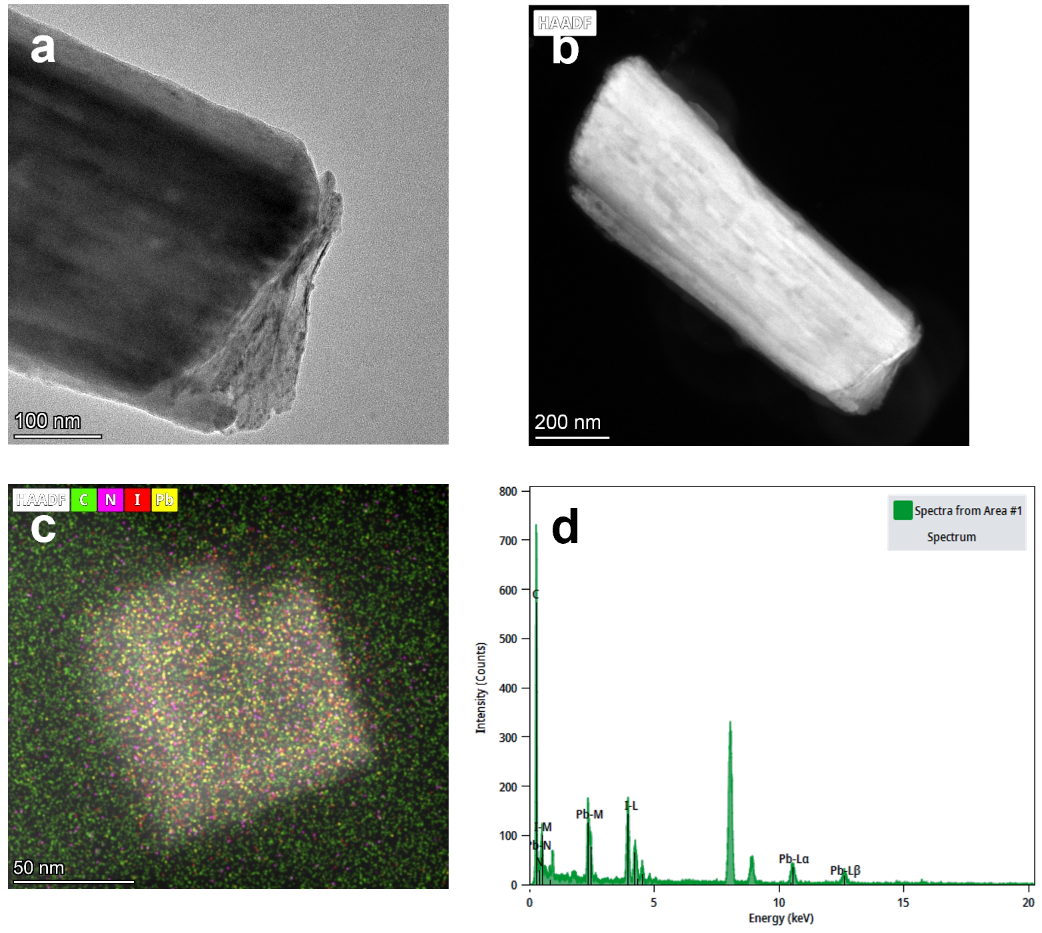


**Fig. S10. TEM characterization of (BA)2PbI4 and (PEA)2PbI4.**

**a**, High-resolution micrograph of (BA)2PbI4 single crystal section. **b**, HAADF image of (BA)2PbI4 single crystal. **c**, HAADF and EDS of (PEA)2PbI4 single crystals with the four elements C, N, Pb, and I characterized in the EDS. **d**, Spectral line intensity maps of the four elements C, N, Pb, and I in (PEA)2PbI4 single crystals, with the highest content of element C distributed throughout the area.

References

S1 Delley, B. From molecules to solids with the DMol3 approach. *The Journal of Chemical Physics* **113**, 7756-7764, doi:10.1063/1.1316015 (2000).

S2 Clark, S. J. *et al.* First principles methods using CASTEP. *Zeitschrift für Kristallographie - Crystalline Materials* **220**, 567-570, doi:10.1524/zkri.220.5.567.65075 (2005).

S3 Delley, B. An all-electron numerical method for solving the local density functional for polyatomic molecules. *The Journal of Chemical Physics* **92**, 508-517, doi:10.1063/1.458452 (1990).
